# Supplementary material for: Serum Oxidative Status in People with Obesity: Relation to Tissue Losses, Glucose Levels, and Weight Reduction
Source: MDPI journal article supplement (doi:10.3390/antiox12111923), 2023-10-27
Supplement: s1 [file s1]

# Supplementary Materials

**Table S1.** Gender analysis of particular compartments loss. Statistical analysis of gender dependent compartment loss. Data are expressed as the mean  $\pm$  SD, for comparison differences between measurements before the diet and after the diet within groups ( $p(1vs2)$ ) and between groups ( $\#p$ ), a  $t$ -test was used. .

| Parameter           | X | Men ( $n = 16$ ) | Women ( $n = 37$ )           | # $p$  |
|---------------------|---|------------------|------------------------------|--------|
| Height (cm)         |   | 176.3 $\pm$ 6.0  | 163.5 $\pm$ 5.9              | <0.001 |
| Weight              | 1 | 113.2 $\pm$ 23.0 | 95.4 $\pm$ 18.0 <sup>3</sup> | <0.01  |
| kg                  | 2 | 103.8 $\pm$ 20.6 | 84.5 $\pm$ 14.6              | <0.001 |
| $p(1vs2)$           |   | <0.001           | <0.001                       |        |
| $\Delta$ weight (%) |   | 8.2 $\pm$ 3.7    | 10.9 $\pm$ 6.9               | ns     |
| BMI                 | 1 | 36.3 $\pm$ 6.4   | 35.7 $\pm$ 6.2               | ns     |
| kg/m <sup>2</sup>   | 2 | 33.3 $\pm$ 6.0   | 31.6 $\pm$ 5.4               | ns     |
| $p(1vs2)$           |   | <0.001           | <0.001                       |        |
| $\Delta$ BMI (%)    |   | 8.2 $\pm$ 3.7    | 10.9 $\pm$ 6.9               | ns     |
| VFA                 | 1 | 149.8 $\pm$ 41.1 | 138.7 $\pm$ 31.6             | ns     |
| cm <sup>2</sup>     | 2 | 126.7 $\pm$ 40.4 | 110.0 $\pm$ 29.6             | ns     |
| $p(1vs2)$           |   | <0.001           | <0.001                       |        |
| $\Delta$ VFA (%)    |   | 16.1 $\pm$ 12.1  | 20.1 $\pm$ 11.9              | ns     |
| SMM                 | 1 | 42.0 $\pm$ 7.7   | 30.8 $\pm$ 5.1               | <0.001 |
| kg                  | 2 | 39.9 $\pm$ 6.8   | 28.2 $\pm$ 3.7               | <0.001 |
| $p(1vs2)$           |   | <0.05            | <0.001                       |        |
| $\Delta$ SMM (%)    |   | 4.7 $\pm$ 5.1    | 7.8 $\pm$ 8.7                | ns     |
| TBW                 | 1 | 54.8 $\pm$ 9.2   | 40.0 $\pm$ 6.0               | <0.001 |
| kg                  | 2 | 51.1 $\pm$ 8.4   | 37.4 $\pm$ 4.8               | <0.001 |
| $p(1vs2)$           |   | <0.01            | <0.001                       |        |
| $\Delta$ TBW (%)    |   | 4.0 $\pm$ 4.7    | 7.0 $\pm$ 7.3                | ns     |

**Legend:** X<sub>1</sub> – before program; X<sub>2</sub> – after program; ns – not significant; BMI – body mass index; VFA – Visceral fat area; SMM – Skeletal muscle mass; TBW – Total body water.

**Table S2.** Statistical analysis of parameters related to saccharide and lipid metabolism in individual groups of obese patients. Data are expressed as the mean  $\pm$  SD, for comparison differences between measurements before the diet and after the diet within groups ( $p(1vs2)$ ) and between groups ( $\#p$ ), a  $t$ -test was used. .

|           |   | WEIGHT LOSS        |                                  | VISCERAL FAT AREA LOSS |                                  | TOTAL BODY WATER LOSS |                                  | SKELETAL MUSCLE MASS LOSS |                                       |
|-----------|---|--------------------|----------------------------------|------------------------|----------------------------------|-----------------------|----------------------------------|---------------------------|---------------------------------------|
|           |   | WL<10%<br>$n = 34$ | WL>10% # $p$<br>$n = 19$         | VFA<15%<br>$n = 21$    | VFA>15% # $p$<br>$n = 31$        | TBW<5%<br>$n = 27$    | TBW>5% # $p$<br>$n = 20$         | SMM<5%<br>$n = 24$        | SMM>5% # $p$<br>$n = 24$              |
| HOMA IR   | 1 | 3.82 $\pm$ 3.49    | 3.48 $\pm$ 3.24 <sup># ns</sup>  | 4.4 $\pm$ 4.2          | 3.2 $\pm$ 2.7 <sup># ns</sup>    | 3.80 $\pm$ 3.81       | 3.90 $\pm$ 3.21 <sup># ns</sup>  | 2.93 $\pm$ 2.68           | 4.81 $\pm$ 4.0 <sup># ns</sup>        |
|           | 2 | 2.80 $\pm$ 2.13    | 2.07 $\pm$ 2.18 <sup># ns</sup>  | 2.7 $\pm$ 2.1          | 2.5 $\pm$ 2.2 <sup># ns</sup>    | 2.41 $\pm$ 1.99       | 2.88 $\pm$ 2.62 <sup># ns</sup>  | 2.30 $\pm$ 1.89           | 2.88 $\pm$ 2.55 <sup># ns</sup>       |
| $p(1vs2)$ |   | <0.05              | ns                               | <0.05                  | ns                               | <0.05                 | ns                               | <0.05                     | <0.05                                 |
| Glucose   | 1 | 113.6 $\pm$ 22.9   | 124.9 $\pm$ 57.4 <sup># ns</sup> | 117.3 $\pm$ 25.5       | 118.8 $\pm$ 46.3 <sup># ns</sup> | 118.2 $\pm$ 49.0      | 119.6 $\pm$ 27.1 <sup># ns</sup> | 105.3 $\pm$ 21.3          | 133.9 $\pm$ 48.7 <sup>#&lt;0.05</sup> |
| [mg/dl]   | 2 | 92.9 $\pm$ 17.3    | 86.6 $\pm$ 15.9 <sup># ns</sup>  | 91.1 $\pm$ 21.0        | 90.5 $\pm$ 14.3 <sup># ns</sup>  | 93.3 $\pm$ 17.9       | 87.4 $\pm$ 16.5 <sup># ns</sup>  | 94.4 $\pm$ 17.6           | 87.3 $\pm$ 16.1 <sup># ns</sup>       |
| $p(1vs2)$ |   | <0.001             | <0.01                            | <0.001                 | <0.01                            | <0.05                 | <0.001                           | <0.05                     | <0.001                                |
| FRU       | 1 | 345.7 $\pm$ 81.4   | 343.2 $\pm$ 69.8 <sup># ns</sup> | 354.9 $\pm$ 69.4       | 338.5 $\pm$ 83.0 <sup># ns</sup> | 333.9 $\pm$ 63.0      | 344.3 $\pm$ 70.5 <sup># ns</sup> | 319.0 $\pm$ 52.3          | 358.8 $\pm$ 71.2 <sup>#&lt;0.05</sup> |
| [umol/l]  | 2 | 319.6 $\pm$ 33.5   | 305.8 $\pm$ 59.2 <sup># ns</sup> | 321.2 $\pm$ 38.1       | 310.2 $\pm$ 49.4 <sup># ns</sup> | 309.9 $\pm$ 47.7      | 314.1 $\pm$ 43.3 <sup># ns</sup> | 312.4 $\pm$ 49.1          | 310.5 $\pm$ 41.4 <sup># ns</sup>      |
| $p(1vs2)$ |   | <0.05              | ns                               | <0.05                  | ns                               | ns                    | <0.05                            | ns                        | <0.01                                 |
| FRU/PROT  | 1 | 4.57 $\pm$ 1.11    | 4.58 $\pm$ 0.90 <sup># ns</sup>  | 4.63 $\pm$ 0.93        | 4.57 $\pm$ 1.04 <sup># ns</sup>  | 4.40 $\pm$ 0.82       | 4.57 $\pm$ 0.75 <sup># ns</sup>  | 4.23 $\pm$ 0.69           | 4.74 $\pm$ 0.78 <sup>#&lt;0.05</sup>  |
|           | 2 | 4.24 $\pm$ 0.48    | 4.12 $\pm$ 0.83 <sup># ns</sup>  | 4.19 $\pm$ 0.58        | 4.17 $\pm$ 0.65 <sup># ns</sup>  | 4.15 $\pm$ 0.70       | 4.19 $\pm$ 0.59 <sup># ns</sup>  | 4.17 $\pm$ 0.69           | 4.15 $\pm$ 0.53 <sup># ns</sup>       |
| $p(1vs2)$ |   | ns                 | ns                               | <0.05                  | ns                               | ns                    | ns                               | ns                        | <0.01                                 |

|          |   |                  |                                 |                  |                            |                  |                            |                  |                            |
|----------|---|------------------|---------------------------------|------------------|----------------------------|------------------|----------------------------|------------------|----------------------------|
| INS      | 1 | 13.0±10.2        | 10.25±5.1 <sup># ns</sup>       | 14.5±12.5        | 10.3±4.7 <sup># ns</sup>   | 11.8±8.7         | 13.1±9.8 <sup># ns</sup>   | 10.5±7.4         | 14.2±10.3 <sup># ns</sup>  |
| [μIU/ml] | 2 | 12.1±8.6         | 9.2±8.3 <sup># ns</sup>         | 11.7±8.4         | 10.6±8.9 <sup># ns</sup>   | 10.2±7.5         | 12.9±10.4 <sup># ns</sup>  | 9.5±7.1          | 12.9±10.1 <sup># ns</sup>  |
| p (1vs2) |   | ns               | ns                              | ns               | ns                         | <b>&lt;0.05</b>  | ns                         | ns               | ns                         |
| CRP      | 1 | 3.19±4.13        | 4.27±5.39 <sup># ns</sup>       | 4.33±6.24        | 3.15±3.17 <sup># ns</sup>  | 3.10±3.87        | 3.92±5.18 <sup># ns</sup>  | 2.66±3.37        | 4.31±5.17 <sup># ns</sup>  |
| [mg/l]   | 2 | 2.92±2.73        | 3.34±3.53 <sup># ns</sup>       | 2.69±2.56        | 3.32±3.37 <sup># ns</sup>  | 2.96±3.09        | 3.14±3.15 <sup># ns</sup>  | 3.05±3.17        | 3.15±2.96 <sup># ns</sup>  |
| p (1vs2) |   | ns               | ns                              | ns               | ns                         | 0.86             | ns                         | ns               | ns                         |
| t-CH     | 1 | 226.3±57.3       | 217.6±50.59 <sup># ns</sup>     | 230.7±63.3       | 214.7±45.3 <sup># ns</sup> | 219.6±53.4       | 226.9±60.2 <sup># ns</sup> | 216.3±53.2       | 232.6±53.1 <sup># ns</sup> |
| [mg/dl]  | 2 | 223.1±45.5       | 209.5±43.7 <sup># ns</sup>      | 227.8±48.9       | 211.2±41.4 <sup># ns</sup> | 214.4±40.2       | 224.4±53.7 <sup># ns</sup> | 215.1±37.2       | 225.8±49.3 <sup># ns</sup> |
| P (1vs2) |   | ns               | ns                              | ns               | ns                         | ns               | ns                         | ns               | ns                         |
| TG       | 1 | 115.9±56.5       | 130.7±57.5 <sup># ns</sup>      | 130.5±67.8       | 112.1±45.7 <sup># ns</sup> | 115.4±48.6       | 129.4±52.9 <sup># ns</sup> | 109.3±47.5       | 135.8±50.6 <sup># ns</sup> |
| [mg/dl]  | 2 | 110.0±47.3       | 90.6±27.1 <sup># ns</sup>       | 110.1±46.0       | 96.1±37.5 <sup># ns</sup>  | 97.9±38.3        | 109.1±40.4 <sup># ns</sup> | 96.1±37.4        | 111.6±38.3 <sup># ns</sup> |
| p (1vs2) |   | ns               | <b>&lt;0.01</b>                 | ns               | <b>&lt;0.05</b>            | <b>&lt;0.05</b>  | ns                         | ns               | <b>&lt;0.05</b>            |
| HDL - CH | 1 | 56.8±12.3        | 55.6±8.7 <sup># ns</sup>        | 56.8±13.8        | 56.0±9.2 <sup># ns</sup>   | 53.7±9.6         | 59.4±11.5 <sup># ns</sup>  | 54.1±10.2        | 58.6±11.0 <sup># ns</sup>  |
| [mg/dl]  | 2 | 60.8±11.5        | 61.9±12.2 <sup># ns</sup>       | 62.9±13.8        | 60.1±9.9 <sup># ns</sup>   | 59.6±10.0        | 62.3±13.0 <sup># ns</sup>  | 60.7±10.0        | 61.2±12.4 <sup># ns</sup>  |
| p (1vs2) |   | <b>&lt;0.001</b> | <b>&lt;0.01</b>                 | <b>&lt;0.001</b> | <b>&lt;0.01</b>            | <b>&lt;0.001</b> | ns                         | <b>&lt;0.001</b> | ns                         |
| LDL - CH | 1 | 140.6±41.3       | 135.9±42.9 <sup># ns</sup>      | 139.4±45.4       | 135.9±37.6 <sup># ns</sup> | 136.0±34.7       | 141.6±51.4 <sup># ns</sup> | 132.6±32.7       | 147.9±46.1 <sup># ns</sup> |
| [mg/dl]  | 2 | 136.0±29.9       | 120.6±28.6 <sup># ns</sup>      | 130.1±30.5       | 129.8±30.4 <sup># ns</sup> | 130.9±31.3       | 128.7±29.2 <sup># ns</sup> | 130.6±27.5       | 132.8±28.2 <sup># ns</sup> |
| p (1vs2) |   | ns               | ns                              | ns               | ns                         | ns               | ns                         | ns               | ns                         |
| New AIP  | 1 | 0.88±0.41        | 0.94±0.30 <sup># ns</sup>       | 0.99±0.48        | 0.83±0.28 <sup># ns</sup>  | 0.93±0.34        | 0.88±0.35 <sup># ns</sup>  | 0.9±0.34         | 0.92±0.33 <sup># ns</sup>  |
|          | 2 | 0.79±0.34        | 0.61±0.20 <sup># &lt;0.05</sup> | 0.79±0.37        | 0.67±0.26 <sup># ns</sup>  | 0.73±0.28        | 0.73±0.29 <sup># ns</sup>  | 0.73±0.29        | 0.75±0.26 <sup># ns</sup>  |
| p (1vs2) |   | <b>&lt;0.05</b>  | <b>&lt;0.001</b>                | <b>&lt;0.01</b>  | <b>&lt;0.01</b>            | <b>&lt;0.001</b> | <b>&lt;0.05</b>            | <b>&lt;0.01</b>  | <b>&lt;0.01</b>            |

**Legend:** X\_1 – before program; X\_2 – after program; ns – not significant; HOMA-IR – Homeostatic Model Assessment for Insulin Resistance; FRU – fructosamine; PROT – proteins; INS – insulin; CRP – C-reactive protein; t-CH – total cholesterol; TG – triacylglycerols; HDL-CH – cholesterol in high density lipoproteins; LDL-CH - cholesterol in low density lipoproteins; AIP – atherogenic index of plasma.

**Table S3.** Statistical analysis of selected anti- and pro-oxidative parameters in individual groups of obese patients. Data are expressed as the mean  $\pm$  SD, for comparison differences between measurements before the diet and after the diet within groups (p(1vs2)) and between groups (#p), a *t*-test was used. .

| PARAMETER | X | WEIGHT LOSS     |                                       | VISCERAL FAT AREA LOSS |                                      | TOTAL BODY WATER LOSS |                                      | SKELETAL MUSCLE MASS LOSS |                                       |
|-----------|---|-----------------|---------------------------------------|------------------------|--------------------------------------|-----------------------|--------------------------------------|---------------------------|---------------------------------------|
|           |   | WL<10%          | WL>10% #p                             | VFA<15%                | VFA>15% #p                           | TBW<5%                | TBW>5% #p                            | SMM<5%                    | SMM>5% #p                             |
|           |   | <i>n</i> = 34   | <i>n</i> = 19                         | <i>n</i> = 21          | <i>n</i> = 31                        | <i>n</i> = 27         | <i>n</i> = 20                        | <i>n</i> = 24             | <i>n</i> = 24                         |
| SOD       | 1 | 13.2 $\pm$ 4.0  | 14.8 $\pm$ 3.5 <sup># ns</sup>        | 15.0 $\pm$ 3.7         | 13.1 $\pm$ 3.9 <sup># ns</sup>       | 12.7 $\pm$ 4.0        | 14.6 $\pm$ 3.4 <sup># ns</sup>       | 11.7 $\pm$ 3.2            | 15.4 $\pm$ 3.3 <sup>#&lt;0.001</sup>  |
| [NU/mL]   | 2 | 16.9 $\pm$ 1.9  | 17.2 $\pm$ 1.7 <sup># ns</sup>        | 17.7 $\pm$ 2.0         | 16.5 $\pm$ 1.6 <sup>#&lt;0.05</sup>  | 16.7 $\pm$ 1.6        | 17.0 $\pm$ 1.7 <sup># ns</sup>       | 16.6 $\pm$ 1.7            | 17.2 $\pm$ 1.5 <sup># ns</sup>        |
| p         |   | <0.001          | <0.01                                 | <0.001                 | <0.001                               | <0.001                | <0.01                                | <0.001                    | <0.05                                 |
| MnSOD     | 1 | 8.1 $\pm$ 2.4   | 6.0 $\pm$ 3.6 <sup>#&lt;0.01</sup>    | 7.5 $\pm$ 3.6          | 7.3 $\pm$ 2.7 <sup># ns</sup>        | 7.7 $\pm$ 2.4         | 6.3 $\pm$ 3.7 <sup># ns</sup>        | 7.57 $\pm$ 2.49           | 6.52 $\pm$ 3.39 <sup># ns</sup>       |
| [NU/mL]   | 2 | 8.8 $\pm$ 2.2   | 9.0 $\pm$ 1.8 <sup># ns</sup>         | 9.4 $\pm$ 2.4          | 8.6 $\pm$ 1.7 <sup># ns</sup>        | 8.4 $\pm$ 1.8         | 9.0 $\pm$ 1.4 <sup># ns</sup>        | 8.35 $\pm$ 1.77           | 8.97 $\pm$ 1.43 <sup># ns</sup>       |
| p         |   | ns              | <0.01                                 | <0.05                  | <0.05                                | ns                    | <0.05                                | ns                        | <0.01                                 |
| CuZnSOD   | 1 | 5.2 $\pm$ 3.7   | 8.8 $\pm$ 5.2 <sup>#&lt;0.01</sup>    | 7.4 $\pm$ 4.6          | 5.8 $\pm$ 4.7 <sup># ns</sup>        | 5.0 $\pm$ 4.2         | 8.2 $\pm$ 5.2 <sup>#&lt;0.05</sup>   | 4.11 $\pm$ 4.0            | 8.86 $\pm$ 4.35 <sup>#&lt;0.001</sup> |
| [NU/mL]   | 2 | 8.1 $\pm$ 1.8   | 8.2 $\pm$ 1.5 <sup># ns</sup>         | 8.3 $\pm$ 1.8          | 8.0 $\pm$ 1.6 <sup># ns</sup>        | 8.4 $\pm$ 1.7         | 7.9 $\pm$ 1.5 <sup># ns</sup>        | 8.20 $\pm$ 1.94           | 8.27 $\pm$ 1.16 <sup># ns</sup>       |
| p         |   | <0.001          | ns                                    | ns                     | <0.05                                | <0.001                | ns                                   | <0.001                    | ns                                    |
| MDA       | 1 | 2.77 $\pm$ 1.1  | 3.23 $\pm$ 0.93 <sup># ns</sup>       | 2.8 $\pm$ 0.72         | 2.9 $\pm$ 1.2 <sup># ns</sup>        | 2.85 $\pm$ 0.92       | 2.77 $\pm$ 0.98 <sup># ns</sup>      | 2.67 $\pm$ 0.94           | 3.02 $\pm$ 0.90 <sup># ns</sup>       |
| [umol/l]  | 2 | 2.20 $\pm$ 0.7  | 2.31 $\pm$ 0.83 <sup># ns</sup>       | 2.4 $\pm$ 0.79         | 2.2 $\pm$ 0.72 <sup># ns</sup>       | 2.12 $\pm$ 0.65       | 2.33 $\pm$ 0.91 <sup># ns</sup>      | 2.07 $\pm$ 0.73           | 2.4 $\pm$ 0.76 <sup># ns</sup>        |
| p         |   | <0.01           | <0.01                                 | <0.05                  | <0.001                               | <0.001                | <0.05                                | <0.01                     | <0.01                                 |
| LPS       | 1 | 604 $\pm$ 341   | 606 $\pm$ 287 <sup># ns</sup>         | 700 $\pm$ 287          | 543 $\pm$ 336 <sup># ns</sup>        | 541 $\pm$ 319         | 620 $\pm$ 320 <sup># ns</sup>        | 471 $\pm$ 300             | 679 $\pm$ 294 <sup>#&lt;0.01</sup>    |
| [umol/l]  | 2 | 595 $\pm$ 277   | 562 $\pm$ 273 <sup># ns</sup>         | 686 $\pm$ 275          | 514 $\pm$ 258 <sup>#&lt;0.05</sup>   | 491 $\pm$ 229         | 652 $\pm$ 307 <sup>#&lt;0.05</sup>   | 465 $\pm$ 212             | 667 $\pm$ 284 <sup>#&lt;0.01</sup>    |
| p         |   | ns              | ns                                    | ns                     | ns                                   | ns                    | ns                                   | ns                        | ns                                    |
| PSH       | 1 | 2.70 $\pm$ 0.59 | 2.60 $\pm$ 0.61 <sup># ns</sup>       | 2.77 $\pm$ 0.52        | 2.63 $\pm$ 0.61 <sup># ns</sup>      | 2.66 $\pm$ 0.59       | 2.67 $\pm$ 0.60 <sup># ns</sup>      | 2.65 $\pm$ 0.59           | 2.67 $\pm$ 0.57 <sup># ns</sup>       |
| [umol/l]  | 2 | 3.00 $\pm$ 0.74 | 2.85 $\pm$ 0.42 <sup># ns</sup>       | 2.99 $\pm$ 0.66        | 2.95 $\pm$ 0.61 <sup># ns</sup>      | 2.89 $\pm$ 0.62       | 3.08 $\pm$ 0.68 <sup># ns</sup>      | 2.99 $\pm$ 0.70           | 2.89 $\pm$ 0.56 <sup># ns</sup>       |
| p         |   | <0.01           | ns                                    | ns                     | <0.01                                | ns                    | <0.01                                | <0.01                     | ns                                    |
| CER       | 1 | 32.63 $\pm$ 7.8 | 37.67 $\pm$ 10.6 <sup>#&lt;0.05</sup> | 35.3 $\pm$ 10.1        | 33.7 $\pm$ 8.7 <sup># ns</sup>       | 33.7 $\pm$ 7.6        | 33.9 $\pm$ 11.6 <sup># ns</sup>      | 32.1 $\pm$ 7.3            | 35.8 $\pm$ 10.5 <sup># ns</sup>       |
| [mg/dl]   | 2 | 34.34 $\pm$ 7.9 | 39.1 $\pm$ 14.1 <sup># ns</sup>       | 37.1 $\pm$ 13.1        | 35.6 $\pm$ 9.0 <sup># ns</sup>       | 33.9 $\pm$ 11.6       | 38.0 $\pm$ 13.8 <sup># ns</sup>      | 34.1 $\pm$ 9.0            | 37.4 $\pm$ 12.7 <sup># ns</sup>       |
| p         |   | ns              | ns                                    | ns                     | ns                                   | ns                    | <0.01                                | ns                        | ns                                    |
| TAC       | 1 | 1.20 $\pm$ 0.22 | 1.17 $\pm$ 0.11 <sup># ns</sup>       | 1.23 $\pm$ 0.22        | 1.17 $\pm$ 0.17 <sup># ns</sup>      | 1.16 $\pm$ 0.23       | 1.21 $\pm$ 0.14 <sup># ns</sup>      | 1.14 $\pm$ 0.24           | 1.22 $\pm$ 0.13 <sup># ns</sup>       |
| [mmol/l]  | 2 | 1.27 $\pm$ 0.12 | 1.21 $\pm$ 0.10 <sup># ns</sup>       | 1.29 $\pm$ 0.11        | 1.21 $\pm$ 0.10 <sup>#&lt;0.05</sup> | 1.20 $\pm$ 0.10       | 1.28 $\pm$ 0.11 <sup>#&lt;0.01</sup> | 1.20 $\pm$ 0.09           | 1.28 $\pm$ 0.11 <sup>#&lt;0.01</sup>  |
| p         |   | ns              | ns                                    | ns                     | ns                                   | ns                    | <0.01                                | 0.23                      | <0.01                                 |
| TOS       | 1 | 5.52 $\pm$ 4.80 | 6.72 $\pm$ 4.38 <sup># ns</sup>       | 4.95 $\pm$ 3.73        | 6.06 $\pm$ 4.22 <sup># ns</sup>      | 5.73 $\pm$ 4.02       | 5.33 $\pm$ 3.57 <sup># ns</sup>      | 5.54 $\pm$ 4.12           | 5.76 $\pm$ 3.41 <sup># ns</sup>       |
| [umol/l]  | 2 | 2.18 $\pm$ 2.26 | 2.05 $\pm$ 0.83 <sup># ns</sup>       | 2.00 $\pm$ 1.24        | 2.18 $\pm$ 2.23 <sup># ns</sup>      | 2.25 $\pm$ 2.35       | 2.04 $\pm$ 1.15 <sup># ns</sup>      | 2.41 $\pm$ 2.43           | 1.88 $\pm$ 1.14 <sup># ns</sup>       |
| p         |   | <0.001          | <0.001                                | <0.01                  | <0.001                               | <0.001                | <0.01                                | <0.01                     | <0.001                                |
| LPH       | 1 | 3.1 $\pm$ 2.9   | 3.9 $\pm$ 2.6 <sup># ns</sup>         | 3.06 $\pm$ 2.50        | 3.33 $\pm$ 2.55 <sup># ns</sup>      | 3.21 $\pm$ 2.48       | 3.07 $\pm$ 2.19 <sup># ns</sup>      | 2.99 $\pm$ 2.50           | 3.43 $\pm$ 2.13 <sup># ns</sup>       |
| [umol/l]  | 2 | 1.2 $\pm$ 1.5   | 1.2 $\pm$ 0.6 <sup># ns</sup>         | 1.16 $\pm$ 0.84        | 1.21 $\pm$ 1.53 <sup># ns</sup>      | 1.25 $\pm$ 1.56       | 1.13 $\pm$ 0.92 <sup># ns</sup>      | 1.35 $\pm$ 1.63           | 1.05 $\pm$ 0.88 <sup># ns</sup>       |
| p         |   | <0.001          | <0.001                                | <0.01                  | <0.001                               | <0.01                 | <0.01                                | <0.01                     | <0.001                                |
| OSI       | 1 | 5.18 $\pm$ 4.39 | 5.83 $\pm$ 3.92 <sup># ns</sup>       | 4.43 $\pm$ 3.73        | 5.35 $\pm$ 3.83 <sup># ns</sup>      | 5.31 $\pm$ 4.0        | 4.48 $\pm$ 3.1 <sup># ns</sup>       | 5.25 $\pm$ 4.11           | 4.81 $\pm$ 3.00 <sup># ns</sup>       |
|           | 2 | 1.84 $\pm$ 2.0  | 1.71 $\pm$ 0.70 <sup># ns</sup>       | 1.67 $\pm$ 0.98        | 1.85 $\pm$ 1.99 <sup># ns</sup>      | 1.99 $\pm$ 2.10       | 1.62 $\pm$ 0.94 <sup># ns</sup>      | 2.06 $\pm$ 2.17           | 1.57 $\pm$ 0.88 <sup># ns</sup>       |
| p         |   | <0.001          | <0.001                                | <0.01                  | <0.001                               | <0.001                | <0.01                                | <0.01                     | <0.001                                |

**Legend:** X\_1 – before program; X\_2 – after program; ns – not significant; SOD – superoxide dismutase; MnSOD – mitochondrial Mn-dependent superoxide dismutase; CuZnSOD – cytosolic Cu,Zn superoxide dismutase; MDA – malondialdehyde; LPS – lipofuscin; PSH – protein thiols; CER – ceruloplasmin; TAC – total non-enzymatic antioxidant capacity; TOS – total oxidant status; LPH – lipid peroxides; OSI – oxidative stress index.

**Table S4.** The differences between chosen parameters in normo- and hyperglycemia groups. Data are expressed as the mean  $\pm$  SD, for comparison differences between measurements before the diet and after the diet within groups (p(1vs2)) and between groups (#p), a *t*-test was used. .

| Parameter                   | X | Normoglycemia (n = 18) | Hyperglycemia (n = 35) | #p              |
|-----------------------------|---|------------------------|------------------------|-----------------|
| Weight loss [kg]            |   | 12.4 $\pm$ 10.2        | 9.2 $\pm$ 5.8          | ns              |
| VFA loss [cm <sup>2</sup> ] |   | 21.1 $\pm$ 18.4        | 21.2 $\pm$ 21.6        | ns              |
| TBW loss [kg]               |   | 2.69 $\pm$ 3.1         | 2.26 $\pm$ 3.91        | ns              |
| SMM loss [kg]               |   | 2.11 $\pm$ 2.67        | 2.07 $\pm$ 3.70        | ns              |
| Glucose [mg/dL]             | 1 | 89.8 $\pm$ 7.8         | 132.00 $\pm$ 40.5      | <0.001<br><0.01 |
|                             | 2 | 81.5 $\pm$ 14.2        | 95.3 $\pm$ 16.5        |                 |
| p (1vs2)                    |   | ns                     | <0.001                 |                 |
| FRU [umol/L]                | 1 | 305.44 $\pm$ 35.01     | 365.01 $\pm$ 84.62     | <0.001ns        |
|                             | 2 | 316.82 $\pm$ 33.61     | 313.49 $\pm$ 49.43     |                 |
| p (1vs2)                    |   | ns                     | <0.01                  |                 |
| FRU/PROT                    | 1 | 4.05 $\pm$ 0.42        | 4.82 $\pm$ 1.14        | <0.01ns         |
|                             | 2 | 4.32 $\pm$ 0.64        | 4.14 $\pm$ 0.61        |                 |
| p (1vs2)                    |   | ns                     | <0.01                  |                 |
| CRP [mg/L]                  | 1 | 4.00 $\pm$ 5.83        | 3.36 $\pm$ 3.90        | ns              |
|                             | 2 | 3.64 $\pm$ 3.48        | 2.81 $\pm$ 2.79        | ns              |
| p (1vs2)                    |   | ns                     | ns                     |                 |
| SOD [NU/mL]                 | 1 | 11.9 $\pm$ 3.3         | 14.7 $\pm$ 3.9         | <0.01<br>ns     |
|                             | 2 | 16.9 $\pm$ 1.5         | 17.1 $\pm$ 2.0         |                 |
| p (1vs2)                    |   | <0.001                 | <0.001                 |                 |
| MnSOD [NU/mL]               | 1 | 6.6 $\pm$ 3.0          | 7.7 $\pm$ 3.0          | ns              |
|                             | 2 | 8.4 $\pm$ 2.1          | 9.1 $\pm$ 2.0          | ns              |
| p (1vs2)                    |   | ns                     | <0.01                  |                 |
| CuZnSOD [NU/mL]             | 1 | 5.3 $\pm$ 4.5          | 7.0 $\pm$ 4.6          | ns              |
|                             | 2 | 8.5 $\pm$ 2.1          | 8.0 $\pm$ 1.4          | ns              |
| p (1vs2)                    |   | <0.05                  | ns                     |                 |
| MDA [umol/L]                | 1 | 2.7 $\pm$ 1.1          | 3.0 $\pm$ 1.0          | ns              |
|                             | 2 | 2.1 $\pm$ 0.8          | 2.3 $\pm$ 0.7          | ns              |
| p (1vs2)                    |   | <0.05                  | <0.001                 |                 |
| LPS [RF]                    | 1 | 422.0 $\pm$ 261.8      | 692.8 $\pm$ 312.3      | <0.01<br><0.05  |
|                             | 2 | 467.2 $\pm$ 268.5      | 639.0 $\pm$ 261.2      |                 |
| p (1vs2)                    |   | ns                     | ns                     |                 |
| PSH [umol/L]                | 1 | 194.1 $\pm$ 47.9       | 205.8 $\pm$ 44.8       | ns              |
|                             | 2 | 203.4 $\pm$ 45.5       | 230.0 $\pm$ 49.5       | ns              |
| p (1vs2)                    |   | ns                     | <0.01                  |                 |
| PSH/PROT                    | 1 | 2.57 $\pm$ 0.63        | 2.71 $\pm$ 0.57        | ns              |
|                             | 2 | 2.74 $\pm$ 0.64        | 3.04 $\pm$ 0.63        | ns              |
| p (1vs2)                    |   | ns                     | <0.01                  |                 |
| CER [mg/dL]                 | 1 | 35.5 $\pm$ 10.3        | 33.8 $\pm$ 8.6         | ns              |
|                             | 2 | 39.0 $\pm$ 14.9        | 34.6 $\pm$ 7.8         | ns              |
| p (1vs2)                    |   | ns                     | ns                     |                 |
| TAC [mmol/L]                | 1 | 1.12 $\pm$ 0.17        | 1.23 $\pm$ 0.20        | ns <0.01        |
|                             | 2 | 1.19 $\pm$ 0.09        | 1.28 $\pm$ 0.11        |                 |
| p (1vs2)                    |   | ns                     | ns                     |                 |
| TOS                         | 1 | 8.04 $\pm$ 6.2         | 4.91 $\pm$ 3.32        | ns              |

|          |   |                  |                  |    |
|----------|---|------------------|------------------|----|
| [μmol/L] | 2 | 2.57±0.66        | 1.92±2.20        | ns |
| p (1vs2) |   | <b>&lt;0.001</b> | <b>&lt;0.001</b> |    |
| LPB      | 1 | 4.50±3.71        | 2.86±2.06        | ns |
| [μmol/L] | 2 | 1.42±0.57        | 1.08±1.49        | ns |
| p (1vs2) |   | <b>&lt;0.001</b> | <b>&lt;0.001</b> |    |

**Legend:** X\_1 – before program; X\_2 – after program; ns – not significant; VFA – visceral fat area; TBW – total body water; SMM – skeletal muscle mass; FRU – fructosamine; PROT – proteins; CRP – C-reactive protein; SOD – superoxide dismutase; MnSOD – mitochondrial Mn-dependent superoxide dismutase; CuZnSOD – cytosolic Cu,Zn superoxide dismutase; MDA – malondialdehyde; LPS – lipofuscin; PSH – protein thiols; CER – ceruloplasmin; TAC – total non-enzymatic antioxidant capacity; TOS – total oxidant status; LPB – lipid peroxides.
